# Supplementary material for: Saudi radiology trainees’ insights on safety and professionalism in the workplace
Source: PeerJ. 2025 Apr 3;13:e19257. doi: 10.7717/peerj.19257 (PMC11972563; doi:10.7717/peerj.19257)
Supplement: Supplemental Information 1 [file peerj-13-19257-s001.xlsx]

## Sheet: Raw data-codebook with factors
ID	Gender	Age	Academic _Level	Training_Hospital	Clinical_Experience	A) Colleague Encouragement Q1) I am encouraged by my colleagues to speak up about traditional patient safety concerns	Q2) I am encouraged by my colleagues to speak up about unprofessional behavior	B) Difficulty Speaking Up Q3) In my clinical area, it is difficult to speak up if I have traditional patient safety concerns	Q4) In my clinical area, it is difficult to speak up if I observe unprofessional behavior	C) Meaningful Change Q5) Speaking up about traditional patient safety concerns results in meaningful change in my clinical area	Q6) Speaking up about unprofessional behavior results in meaningful change in my clinical area	D) Clinical Culture Q7) The culture in my clinical area makes it easy to speak up about traditional patient safety concerns that do not involve me or my patients	Q8) The culture in my clinical area makes it easy to speak up about unprofessional behavior that does not involve me or my patients	E) Observe Others Speaking Up Q9) In my clinical area, I observe others speaking up about traditional patient safety concerns even if they are not directly involved in the patient’s care	Q10) In my clinical area, I observe others speaking up about unprofessional behavior even if they are not directly involved in the patient’s care	How inclined would you be to speak up about the breach in sterile technique if the clinician was a(n): A.Nurse	How inclined would you be to speak up about the breach in sterile technique if the clinician was a(n): B.Intern	How inclined would you be to speak up about the breach in sterile technique if the clinician was a(n): C.Resident	How inclined would you be to speak up about the breach in sterile technique if the clinician was a(n): D.Attending Radiologist	What is the potential for harm to the patient in this situation?
1	Male	20-24	Radiology Internship	King Abdulaziz Medical City- Jeddah	Less than 1 year	Agree	Agree	Disagree	Disagree	Strongly Disagree	Strongly Disagree	Agree	Agree	Agree	Neutral	Unlikely	Not at all likely	Likely	Completely likely	Neutral
2	Female	20-24	Radiology Internship	King Abdulaziz Medical City- Jeddah	Less than 1 year	Strongly Agree	Strongly Agree	Strongly Disagree	Strongly Disagree	Agree	Agree	Strongly Agree	Strongly Disagree	Strongly Agree	Strongly Agree	Completely likely	Completely likely	Completely likely	Completely likely	Low
3	Male	20-24	Radiology Internship	King Abdulaziz Medical City- Jeddah	Less than 1 year	Strongly Agree	Agree	Disagree	Neutral	Strongly Agree	Strongly Agree	Agree	Neutral	Disagree	Agree	Completely likely	Completely likely	Completely likely	Completely likely	Very High
4	Male	20-24	Radiology Internship	King Abdulaziz Medical City- Jeddah	Less than 1 year	Strongly Agree	Strongly Agree	Strongly Disagree	Strongly Disagree	Strongly Agree	Strongly Agree	Agree	Agree	Strongly Agree	Strongly Agree	Completely likely	Completely likely	Completely likely	Completely likely	Very High
5	Female	20-24	Radiology Internship	King Abdulaziz Medical City- Jeddah	Less than 1 year	Agree	Agree	Disagree	Disagree	Agree	Agree	Agree	Neutral	Agree	Agree	Completely likely	Completely likely	Likely	Neutral	High
6	Male	20-24	Radiology Internship	King Abdulaziz Medical City- Jeddah	Less than 1 year	Agree	Neutral	Agree	Disagree	Strongly Agree	Strongly Agree	Strongly Agree	Disagree	Neutral	Agree	Not at all likely	Not at all likely	Completely likely	Likely	Neutral
7	Male	20-24	Radiology Internship	King Abdulaziz Medical City- Jeddah	Less than 1 year	Strongly Agree	Agree	Agree	Strongly Agree	Agree	Agree	Neutral	Neutral	Neutral	Neutral	Completely likely	Neutral	Completely likely	Likely	Very High
8	Female	25-29	Radiology Residency	King Abdulaziz Medical City- Jeddah	1-3 years	Agree	Strongly Agree	Strongly Disagree	Strongly Disagree	Agree	Neutral	Agree	Neutral	Neutral	Neutral	Likely	Completely likely	Completely likely	Likely	High
9	Female	20-24	Radiology Internship	King Abdulaziz Medical City- Jeddah	Less than 1 year	Strongly Disagree	Disagree	Agree	Agree	Neutral	Neutral	Disagree	Disagree	Agree	Agree	Completely likely	Completely likely	Completely likely	Likely	Low
10	Female	20-24	Radiology Internship	King Abdulaziz Medical City- Jeddah	Less than 1 year	Agree	Strongly Agree	Disagree	Disagree	Agree	Agree	Agree	Strongly Agree	Agree	Strongly Agree	Completely likely	Unlikely	Unlikely	Not at all likely	Neutral
11	Female	20-24	Radiology Internship	King Abdulaziz Medical City- Jeddah	Less than 1 year	Agree	Neutral	Disagree	Agree	Agree	Disagree	Agree	Disagree	Strongly Agree	Neutral	Completely likely	Completely likely	Neutral	Neutral	High
12	Female	20-24	Radiology Internship	King Abdulaziz Medical City- Jeddah	Less than 1 year	Agree	Disagree	Disagree	Agree	Strongly Agree	Strongly Agree	Agree	Agree	Agree	Strongly Agree	Completely likely	Completely likely	Completely likely	Unlikely	High
13	Female	20-24	Radiology Internship	King Abdulaziz Medical City- Jeddah	Less than 1 year	Disagree	Agree	Disagree	Disagree	Neutral	Neutral	Agree	Agree	Agree	Agree	Neutral	Neutral	Neutral	Neutral	Neutral
14	Male	20-24	Radiology Internship	King Abdulaziz Medical City- Jeddah	Less than 1 year	Agree	Disagree	Disagree	Agree	Disagree	Agree	Agree	Disagree	Agree	Agree	Completely likely	Completely likely	Completely likely	Completely likely	Very High
15	Female	20-24	Radiology Internship	King Abdulaziz Medical City- Jeddah	Less than 1 year	Agree	Agree	Disagree	Disagree	Disagree	Neutral	Agree	Agree	Agree	Agree	Likely	Completely likely	Likely	Completely likely	High
16	Male	20-24	Radiology Internship	King Abdulaziz Medical City- Jeddah	Less than 1 year	Strongly Agree	Strongly Agree	Disagree	Disagree	Strongly Agree	Strongly Agree	Strongly Agree	Agree	Strongly Agree	Strongly Agree	Likely	Completely likely	Neutral	Completely likely	High
17	Female	20-24	Radiology Internship	King Abdulaziz Medical City- Jeddah	Less than 1 year	Agree	Agree	Disagree	Disagree	Agree	Agree	Agree	Agree	Strongly Agree	Strongly Agree	Unlikely	Completely likely	Neutral	Unlikely	Neutral
18	Female	20-24	Radiology Internship	King Abdulaziz Medical City- Jeddah	Less than 1 year	Agree	Agree	Disagree	Disagree	Agree	Agree	Agree	Disagree	Agree	Agree	Completely likely	Completely likely	Completely likely	Completely likely	Very High
19	Female	20-24	Radiology Internship	King Abdulaziz Medical City- Jeddah	Less than 1 year	Strongly Agree	Agree	Neutral	Agree	Strongly Agree	Strongly Agree	Neutral	Neutral	Strongly Agree	Strongly Agree	Likely	Likely	Neutral	Likely	Very High
20	Female	20-24	Radiology Internship	King Abdulaziz Medical City- Jeddah	Less than 1 year	Agree	Agree	Agree	Disagree	Agree	Agree	Disagree	Strongly Disagree	Disagree	Agree	Unlikely	Neutral	Likely	Neutral	High
21	Male	25-29	Radiology Residency	King Abdulaziz Medical City- Jeddah	1-3 years	Strongly Agree	Strongly Agree	Strongly Disagree	Strongly Disagree	Neutral	Strongly Agree	Strongly Agree	Strongly Agree	Strongly Agree	Strongly Agree	Completely likely	Likely	Completely likely	Completely likely	High
22	Female	20-24	Radiology Internship	King Abdulaziz Medical City- Jeddah	Less than 1 year	Neutral	Agree	Disagree	Disagree	Agree	Agree	Agree	Agree	Strongly Agree	Agree	Completely likely	Completely likely	Likely	Likely	Very High
23	Male	20-24	Radiology Internship	King Saud Medical City- Riyadh	Less than 1 year	Strongly Agree	Agree	Disagree	Disagree	Agree	Agree	Agree	Agree	Agree	Agree	Likely	Likely	Likely	Likely	High
24	Female	20-24	Radiology Internship	King Abdulaziz Medical City- Jeddah	Less than 1 year	Agree	Strongly Agree	Disagree	Neutral	Neutral	Neutral	Disagree	Strongly Disagree	Agree	Agree	Likely	Completely likely	Likely	Unlikely	Neutral
25	Male	25-29	Radiology Residency	King Abdulaziz Medical City- Jeddah	1-3 years	Agree	Agree	Disagree	Strongly Disagree	Disagree	Disagree	Agree	Agree	Agree	Agree	Likely	Likely	Likely	Likely	High
26	Male	20-24	Radiology Internship	King Abdulaziz Medical City- Jeddah	Less than 1 year	Strongly Agree	Strongly Agree	Neutral	Disagree	Agree	Agree	Agree	Agree	Agree	Agree	Likely	Likely	Likely	Likely	High
27	Male	20-24	Radiology Internship	King Abdulaziz Medical City- Jeddah	Less than 1 year	Strongly Agree	Strongly Agree	Strongly Agree	Strongly Agree	Strongly Agree	Strongly Agree	Strongly Agree	Strongly Agree	Strongly Agree	Strongly Agree	Completely likely	Completely likely	Neutral	Neutral	Very High
28	Male	25-29	Radiology Internship	King Saud Medical City- Riyadh	3-5 years	Neutral	Agree	Agree	Neutral	Agree	Neutral	Neutral	Agree	Agree	Neutral	Neutral	Unlikely	Neutral	Likely	Neutral
29	Female	30 or above	Radiology Residency	King Saud Medical City- Riyadh	More than 5 years	Agree	Agree	Disagree	Disagree	Neutral	Strongly Disagree	Strongly Agree	Agree	Neutral	Neutral	Completely likely	Completely likely	Completely likely	Likely	High
30	Female	30 or above	Radiology Residency	King Saud Medical City- Riyadh	More than 5 years	Strongly Agree	Strongly Agree	Disagree	Disagree	Agree	Agree	Neutral	Agree	Agree	Agree	Completely likely	Completely likely	Likely	Neutral	Neutral
31	Female	25-29	Radiology Residency	King Saud Medical City- Riyadh	3-5 years	Neutral	Neutral	Agree	Agree	Agree	Neutral	Neutral	Neutral	Agree	Agree	Neutral	Neutral	Unlikely	Neutral	Low
32	Male	20-24	Radiology Internship	King Saud Medical City- Riyadh	Less than 1 year	Disagree	Strongly Disagree	Agree	Agree	Agree	Neutral	Agree	Agree	Neutral	Neutral	Not at all likely	Unlikely	Not at all likely	Not at all likely	Neutral
33	Male	30 or above	Radiology Residency	King Saud Medical City- Riyadh	More than 5 years	Neutral	Neutral	Neutral	Agree	Agree	Neutral	Neutral	Agree	Disagree	Disagree	Neutral	Neutral	Neutral	Neutral	Neutral
34	Female	30 or above	Radiology Internship	King Saud Medical City- Riyadh	3-5 years	Disagree	Neutral	Neutral	Neutral	Neutral	Agree	Neutral	Neutral	Agree	Neutral	Not at all likely	Neutral	Not at all likely	Not at all likely	Low
35	Female	30 or above	Radiology Residency	King Saud Medical City- Riyadh	More than 5 years	Agree	Disagree	Neutral	Agree	Neutral	Neutral	Neutral	Agree	Agree	Neutral	Neutral	Neutral	Neutral	Not at all likely	High
36	Male	25-29	Radiology Internship	King Saud Medical City- Riyadh	3-5 years	Strongly Disagree	Disagree	Agree	Agree	Disagree	Disagree	Agree	Neutral	Agree	Neutral	Neutral	Neutral	Likely	Neutral	Neutral
37	Female	30-35	Radiology Residency	King Saud Medical City- Riyadh	More than 5 years	Disagree	Neutral	Disagree	Neutral	Neutral	Neutral	Agree	Neutral	Neutral	Strongly Agree	Completely likely	Neutral	Neutral	Neutral	Very Low
38	Female	25-29	Radiology Residency	King Saud Medical City- Riyadh	Less than 1 year	Neutral	Neutral	Agree	Agree	Neutral	Disagree	Agree	Neutral	Agree	Neutral	Neutral	Likely	Neutral	Likely	High
39	Male	30 or above	Radiology Residency	King Saud Medical City- Riyadh	More than 5 years	Agree	Agree	Neutral	Neutral	Agree	Agree	Neutral	Neutral	Disagree	Agree	Neutral	Likely	Likely	Unlikely	Neutral
40	Male	30 or above	Radiology Internship	King Saud Medical City- Riyadh	3-5 years	Disagree	Neutral	Agree	Agree	Agree	Neutral	Agree	Disagree	Neutral	Neutral	Completely likely	Not at all likely	Neutral	Unlikely	Neutral
41	Male	30 or above	Radiology Residency	King Saud Medical City- Riyadh	More than 5 years	Agree	Agree	Neutral	Disagree	Agree	Agree	Disagree	Agree	Strongly Agree	Disagree	Completely likely	Completely likely	Completely likely	Completely likely	High
42	Female	25-29	Radiology Internship	King Saud Medical City- Riyadh	1-3 years	Agree	Neutral	Disagree	Disagree	Agree	Agree	Agree	Agree	Agree	Agree	Unlikely	Likely	Unlikely	Not at all likely	High
43	Female	30 or above	Radiology Residency	King Saud Medical City- Riyadh	More than 5 years	Disagree	Strongly Disagree	Agree	Agree	Neutral	Neutral	Agree	Disagree	Disagree	Agree	Unlikely	Completely likely	Unlikely	Not at all likely	Low
44	Female	25-29	Radiology Internship	King Saud Medical City- Riyadh	1-3 years	Agree	Agree	Disagree	Neutral	Agree	Agree	Agree	Neutral	Agree	Neutral	Unlikely	Completely likely	Likely	Unlikely	Neutral
45	Male	25-29	Radiology Residency	King Saud Medical City- Riyadh	3-5 years	Agree	Neutral	Disagree	Disagree	Agree	Neutral	Disagree	Neutral	Agree	Agree	Likely	Neutral	Neutral	Likely	High
46	Female	30 or above	Radiology Residency	King Saud Medical City- Riyadh	More than 5 years	Agree	Agree	Disagree	Strongly Disagree	Agree	Agree	Strongly Agree	Agree	Neutral	Disagree	Likely	Not at all likely	Completely likely	Completely likely	Very High
47	Female	30 or above	Radiology Residency	King Saud Medical City- Riyadh	More than 5 years	Agree	Disagree	Neutral	Strongly Disagree	Agree	Agree	Agree	Disagree	Neutral	Disagree	Completely likely	Likely	Completely likely	Completely likely	Very High
48	Female	25-29	Radiology Residency	King Saud Medical City- Riyadh	3-5 years	Agree	Agree	Disagree	Disagree	Agree	Agree	Neutral	Agree	Neutral	Neutral	Neutral	Neutral	Neutral	Neutral	Low
49	Female	25-29	Radiology Internship	King Saud Medical City- Riyadh	More than 5 years	Neutral	Neutral	Agree	Disagree	Strongly Agree	Neutral	Neutral	Agree	Neutral	Neutral	Likely	Unlikely	Likely	Unlikely	Low
50	Female	30 or above	Radiology Residency	King Saud Medical City- Riyadh	More than 5 years	Agree	Neutral	Disagree	Disagree	Agree	Agree	Neutral	Disagree	Neutral	Disagree	Neutral	Completely likely	Neutral	Neutral	Low
51	Female	30 or above	Radiology Residency	King Saud Medical City- Riyadh	3-5 years	Agree	Disagree	Neutral	Disagree	Neutral	Agree	Neutral	Neutral	Disagree	Neutral	Neutral	Neutral	Neutral	Neutral	Neutral
52	Male	30 or above	Radiology Residency	King Saud Medical City- Riyadh	More than 5 years	Strongly Agree	Strongly Agree	Disagree	Neutral	Neutral	Neutral	Agree	Agree	Neutral	Neutral	Completely likely	Completely likely	Completely likely	Likely	High
53	Female	30 or above	Radiology Residency	King Saud Medical City- Riyadh	1-3 years	Neutral	Agree	Disagree	Neutral	Neutral	Neutral	Neutral	Neutral	Neutral	Disagree	Likely	Likely	Neutral	Unlikely	Neutral
54	Female	30 or above	Radiology Residency	King Saud Medical City- Riyadh	More than 5 years	Disagree	Strongly Disagree	Agree	Agree	Neutral	Agree	Disagree	Disagree	Disagree	Disagree	Unlikely	Completely likely	Not at all likely	Not at all likely	Neutral
55	Female	25-29	Radiology Internship	King Saud Medical City- Riyadh	3-5 years	Agree	Agree	Neutral	Agree	Neutral	Neutral	Agree	Agree	Neutral	Agree	Likely	Likely	Likely	Likely	Very High
56	Male	30 or above	Radiology Residency	King Saud Medical City- Riyadh	More than 5 years	Neutral	Disagree	Disagree	Strongly Disagree	Neutral	Disagree	Neutral	Neutral	Neutral	Agree	Completely likely	Completely likely	Neutral	Neutral	Very Low
57	Male	30 or above	Radiology Residency	King Saud Medical City- Riyadh	More than 5 years	Strongly Disagree	Disagree	Agree	Agree	Disagree	Disagree	Agree	Agree	Agree	Agree	Unlikely	Completely likely	Unlikely	Unlikely	Neutral
58	Male	30 or above	Radiology Residency	King Saud Medical City- Riyadh	More than 5 years	Agree	Agree	Disagree	Strongly Disagree	Neutral	Neutral	Agree	Agree	Agree	Disagree	Completely likely	Completely likely	Completely likely	Completely likely	Very High
59	Female	20-24	Radiology Internship	King Abdulaziz Medical City- Jeddah	Less than 1 year	Strongly Agree	Agree	Disagree	Disagree	Strongly Agree	Strongly Agree	Strongly Agree	Strongly Agree	Neutral	Neutral	Completely likely	Completely likely	Completely likely	Completely likely	High
60	Female	30-35	Radiology Residency	King Abdulaziz Medical City- Jeddah	More than 5 years	Agree	Neutral	Agree	Agree	Neutral	Strongly Agree	Neutral	Neutral	Agree	Neutral	Neutral	Unlikely	Neutral	Neutral	High
61	Male	20-24	Radiology Internship	King Abdulaziz Medical City- Jeddah	Less than 1 year	Strongly Agree	Strongly Agree	Strongly Disagree	Strongly Disagree	Agree	Agree	Agree	Agree	Neutral	Neutral	Completely likely	Completely likely	Completely likely	Completely likely	Very High
62	Male	20-24	Radiology Internship	King Abdulaziz Medical City- Jeddah	Less than 1 year	Agree	Strongly Agree	Disagree	Disagree	Agree	Strongly Agree	Agree	Neutral	Agree	Agree	Likely	Completely likely	Neutral	Unlikely	Low
63	Male	25-29	Radiology Residency	King Saud Medical City- Riyadh	3-5 years	Agree	Strongly Disagree	Disagree	Agree	Neutral	Disagree	Disagree	Agree	Disagree	Neutral	Completely likely	Likely	Completely likely	Completely likely	High
64	Male	25-29	Radiology Residency	King Saud Medical City- Riyadh	More than 5 years	Agree	Disagree	Neutral	Neutral	Neutral	Neutral	Neutral	Neutral	Agree	Neutral	Unlikely	Unlikely	Unlikely	Unlikely	High
65	Female	25-29	Radiology Residency	King Saud Medical City- Riyadh	3-5 years	Agree	Agree	Disagree	Strongly Disagree	Neutral	Neutral	Agree	Neutral	Agree	Agree	Likely	Likely	Likely	Likely	High
66	Male	25-29	Radiology Residency	King Saud Medical City- Riyadh	1-3 years	Agree	Neutral	Disagree	Disagree	Neutral	Disagree	Neutral	Neutral	Agree	Neutral	Unlikely	Unlikely	Unlikely	Unlikely	Neutral
67	Female	25-29	Radiology Residency	King Saud Medical City- Riyadh	3-5 years	Disagree	Neutral	Agree	Strongly Agree	Strongly Agree	Agree	Neutral	Agree	Agree	Agree	Neutral	Unlikely	Completely likely	Likely	Neutral
68	Male	25-29	Radiology Residency	King Saud Medical City- Riyadh	1-3 years	Neutral	Neutral	Disagree	Disagree	Neutral	Neutral	Disagree	Disagree	Disagree	Disagree	Completely likely	Completely likely	Completely likely	Likely	High
69	Male	25-29	Radiology Residency	King Saud Medical City- Riyadh	3-5 years	Agree	Disagree	Agree	Agree	Neutral	Agree	Neutral	Neutral	Agree	Neutral	Completely likely	Not at all likely	Neutral	Likely	Very High
70	Female	20-24	Radiology Internship	King Saud Medical City- Riyadh	Less than 1 year	Neutral	Agree	Disagree	Disagree	Agree	Neutral	Agree	Disagree	Agree	Neutral	Completely likely	Neutral	Neutral	Completely likely	High
71	Female	20-24	Radiology Internship	King Saud Medical City- Riyadh	Less than 1 year	Agree	Disagree	Disagree	Disagree	Agree	Agree	Agree	Agree	Agree	Disagree	Neutral	Neutral	Neutral	Neutral	Neutral
72	Female	25-29	Radiology Residency	King Saud Medical City- Riyadh	3-5 years	Agree	Agree	Disagree	Neutral	Neutral	Agree	Neutral	Neutral	Strongly Agree	Agree	Completely likely	Neutral	Likely	Likely	High
73	Male	25-29	Radiology Residency	King Saud Medical City- Riyadh	3-5 years	Agree	Agree	Disagree	Disagree	Strongly Agree	Agree	Strongly Agree	Strongly Disagree	Agree	Agree	Likely	Likely	Likely	Likely	Very Low
74	Male	30 or above	Radiology Residency	King Saud Medical City- Riyadh	More than 5 years	Strongly Agree	Agree	Neutral	Neutral	Neutral	Agree	Neutral	Neutral	Disagree	Neutral	Completely likely	Not at all likely	Neutral	Completely likely	Neutral
75	Female	20-24	Radiology Internship	King Saud Medical City- Riyadh	Less than 1 year	Strongly Disagree	Disagree	Agree	Strongly Agree	Neutral	Neutral	Disagree	Disagree	Neutral	Neutral	Completely likely	Not at all likely	Completely likely	Completely likely	Very High
76	Female	30 or above	Radiology Residency	King Saud Medical City- Riyadh	1-3 years	Strongly Agree	Agree	Disagree	Disagree	Agree	Strongly Agree	Agree	Agree	Neutral	Agree	Completely likely	Likely	Completely likely	Completely likely	High
77	Female	20-24	Radiology Internship	King Saud Medical City- Riyadh	Less than 1 year	Disagree	Neutral	Agree	Agree	Neutral	Disagree	Disagree	Neutral	Disagree	Neutral	Likely	Not at all likely	Neutral	Likely	Neutral
78	Female	20-24	Radiology Internship	King Saud Medical City- Riyadh	Less than 1 year	Agree	Agree	Strongly Disagree	Strongly Disagree	Agree	Agree	Agree	Neutral	Neutral	Strongly Disagree	Completely likely	Completely likely	Completely likely	Completely likely	Low
79	Male	20-24	Radiology Internship	King Saud Medical City- Riyadh	Less than 1 year	Disagree	Disagree	Agree	Agree	Neutral	Disagree	Agree	Agree	Neutral	Neutral	Likely	Not at all likely	Neutral	Completely likely	High
80	Female	25-29	Radiology Residency	King Saud Medical City- Riyadh	1-3 years	Agree	Strongly Agree	Neutral	Neutral	Agree	Strongly Agree	Agree	Agree	Agree	Agree	Likely	Unlikely	Completely likely	Completely likely	High
81	Female	20-24	Radiology Internship	King Saud Medical City- Riyadh	Less than 1 year	Agree	Agree	Disagree	Disagree	Neutral	Agree	Agree	Agree	Agree	Agree	Likely	Likely	Likely	Likely	Neutral
